# Supplementary material for: 3D heterometal–organic frameworks based on oxydiacetic acid
Source: Royal Society of Chemistry journal article supplement (doi:10.1039/b910838f), 2009-11-28
Supplement: b910838f.pdf [file b910838f.pdf]

## ESI

# The 3D Heterometal-Organic Frameworks Based on Oxydiacetic Acid

Ying Wang, Zhen-Jie Zhang, Wei Shi, Peng Cheng,<sup>\*</sup> Dai-Zheng Liao, Shi-Ping Yan

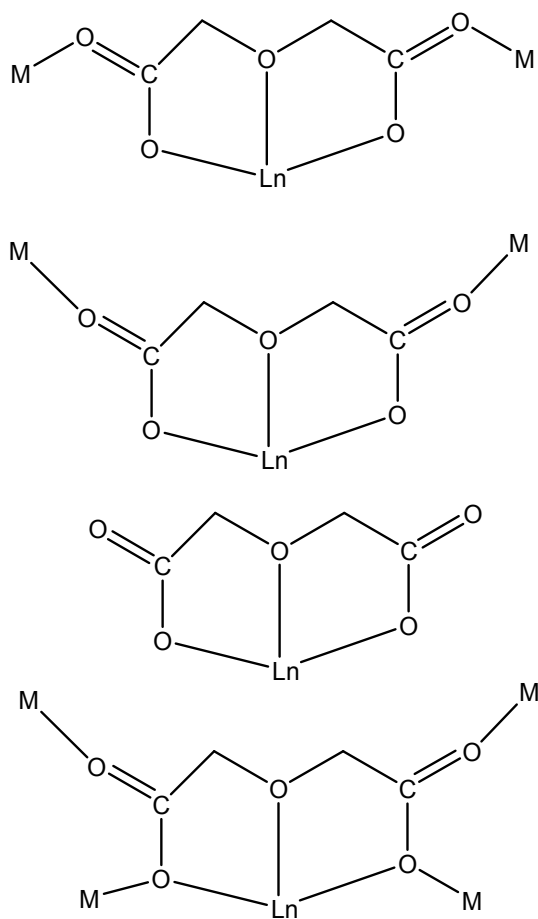

**Figure S1.** The coordination motifs of H<sub>2</sub>oda.

---

<sup>\*</sup> E-mail: pcheng@nankai.edu.cn

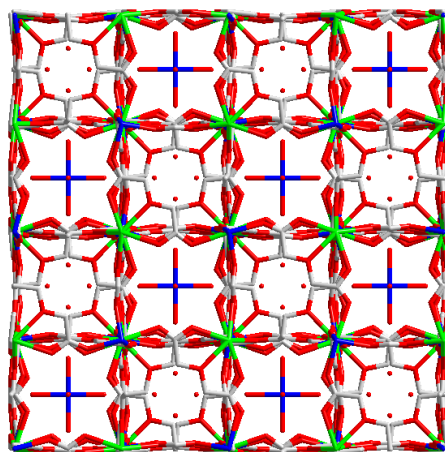

**Figure S2.** View of the 3D network along *c* direction in HMOF-II; green, La; blue, Mn; red, O; gray, C.

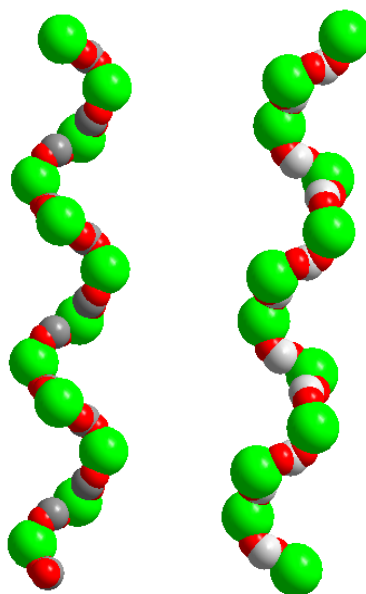

**Figure S3.** Space-filling view of the helical chains in HMOF-III; red, O; gray, C; green, La.

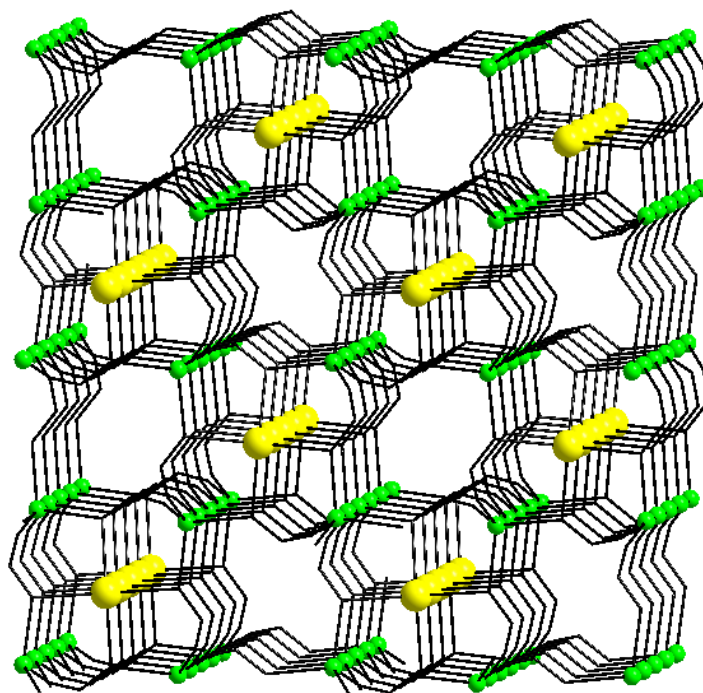

**Figure S4.** View of the 3D framework along  $c$  direction of HMOF-III; green, La; yellow, Pb; carboxylate group represents as black line; H atoms, guest molecules and mono-coordinated L ligands are omitted for clarity.

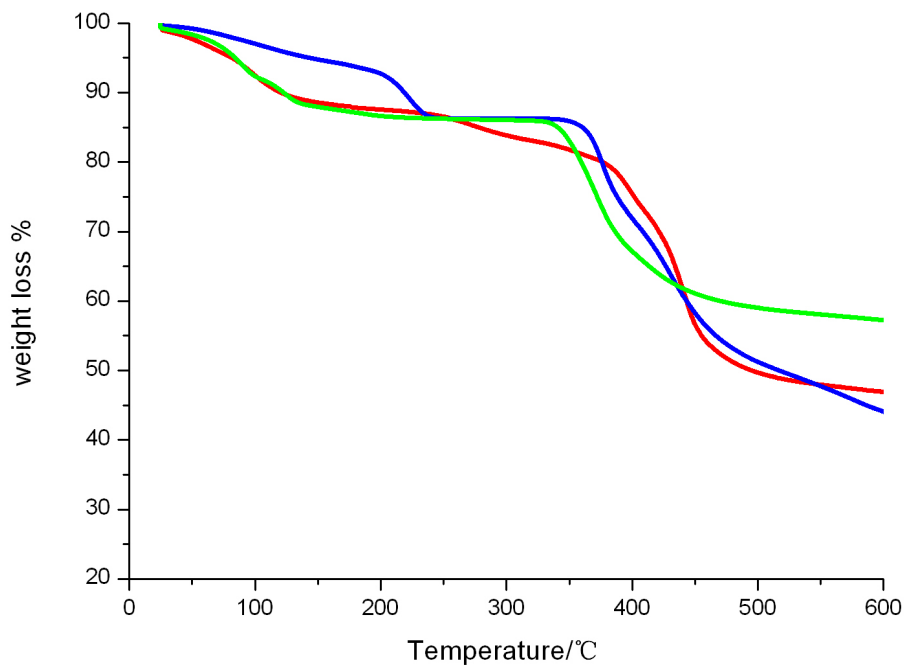

**Figure S5.** TGA plot of HMOF-I (red), HMOF-II (blue) and HMOF-III (green).

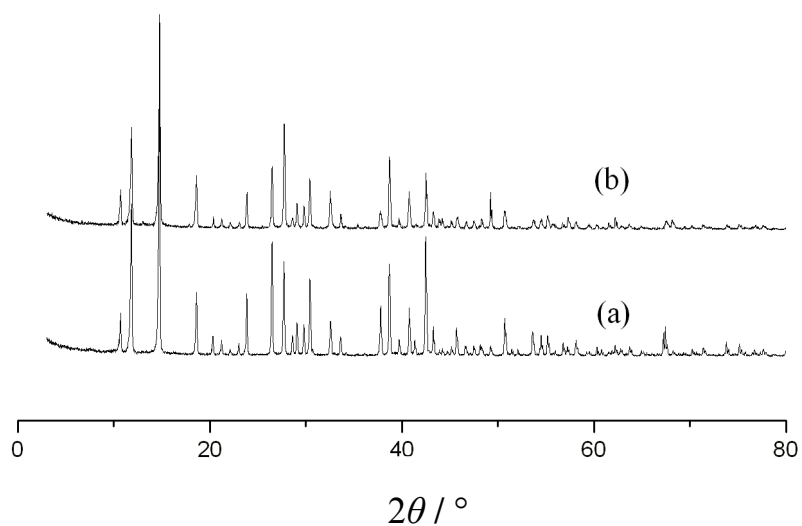

**Figure S6.** X-ray powder diffraction pattern of **La-Zn**: (a) as synthesized; (b) at 100 °C.

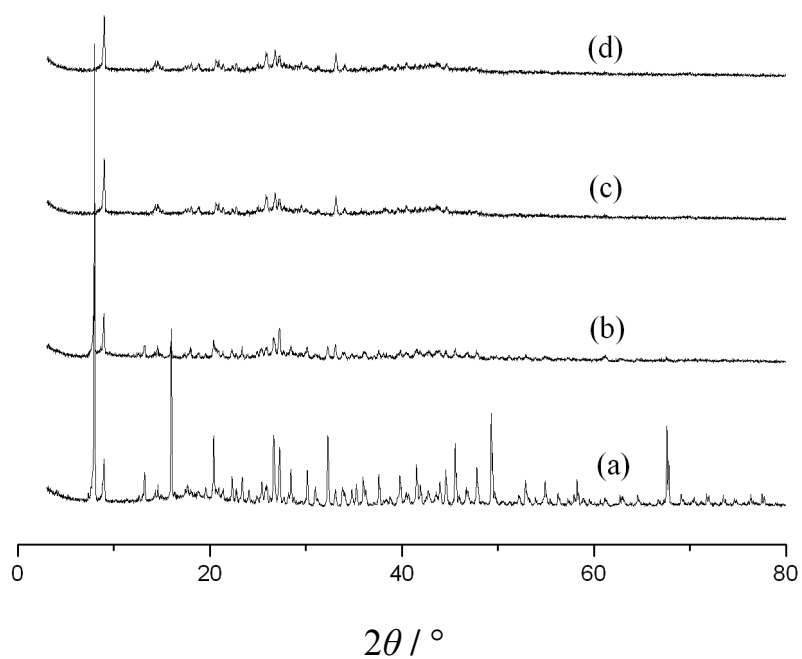

**Figure S7.** X-ray powder diffraction pattern of **La-Pb**: (a) as synthesized; (b) at 100 °C; (c) at 150 °C; (d) at 200 °C.
